# Supplementary material
Source: PubMed Central journal article supplement (PMC2783425)

# Supplemental Data

## The SufBCD Fe-S Scaffold Complex Interacts with SufA for Fe-S Cluster Transfer

*Harsimranjit K. Chahal, Yuyuan Dai, Avneesh Saini, Carla Ayala-Castro and F. Wayne Outten*

Department of Chemistry and Biochemistry, University of South Carolina, 631 Sumter Street, Columbia  
SC, 29208 USA

**Figure S1.** (A) Increasing amounts of SufA pre-labeled with Mts-Atf-Biotin were incubated for 1 hr with 2  $\mu\text{M}$  of SufC or the SufBCD complex. (B) Label transfer analysis of SufA interaction with the SufBCD complex in the presence of ATP. SufA (4  $\mu\text{M}$ ) pre-labeled with Mts-Atf-Biotin was incubated for 1 hr with 2  $\mu\text{M}$  of the SufBCD complex. ATP was present at 0, 1, 10, 50, 100, or 300  $\mu\text{M}$  final concentration during the incubation (increasing concentrations indicated by grey gradient bar above gel). After UV-light induced cross-linking, samples from (A) and (B) were separated by reducing SDS-PAGE and the location of the biotin tag was determined by immunoblot using streptavidin conjugated to horseradish peroxidase.

**Figure S2.** (A) Surface plasmon resonance analysis of SufE inhibition of SufA-SufS interactions. Increasing amounts of SufE were pre-mixed with 2  $\mu\text{M}$  SufS for 20 min prior to injection over immobilized SufA. The percent binding of SufS to SufA (Y-axis unit) was calculated using the binding of 2  $\mu\text{M}$  SufS to immobilized SufA in the absence of SufE (260 response units) as “100 % binding” and the reduction of binding signal to the baseline value of immobilized SufA alone as “0 % binding”. The X-axis is the concentration of SufE divided by the concentration of SufS (molar ratio) for each condition. (B) Comparison of Fe-SufA and ferrous ammonium sulfate as iron sources for SufBCD Fe-S cluster reconstitution. Fe-SufA was prepared as described in Materials and Methods. Fe-SufA or ferrous ammonium sulfate (FAS) were added in excess to provide 5 equivalents Fe per mole SufBCD in a reaction buffer containing SufBCD (300  $\mu\text{M}$ ) and SufS-SufE/L-cysteine. The reaction mixture was incubated for 1.5-2 h and then separated by anaerobic gel filtration. SufA and SufBCD were further analyzed for Fe-S cluster content. UV-visible absorption spectra of SufBCD reconstituted with FAS (trace 1, thick black line), SufBCD reconstituted with Fe-SufA (trace 2, thin black line), or SufA after reconstitution (trace 3, grey line). See Results for more details.

**Figure S3.** (A) Circular dichroism spectra of 280  $\mu\text{M}$  of holoSufBCD (red trace) and holoSufA (black trace) after anaerobic reconstitution as described in Materials and Methods. (B) Stability of the Fe-S clusters in 280  $\mu\text{M}$  holoSufBCD or holoSufA in the presence of increasing EDTA. UV-Visible

absorption spectra of samples were taken at each EDTA concentration. The percent decrease in absorption at 420 nm (SufA) or 408 nm (SufBCD) was calculated using the initial value (- EDTA) as 100 % and is plotted as a function of EDTA concentration.

# Figure S1

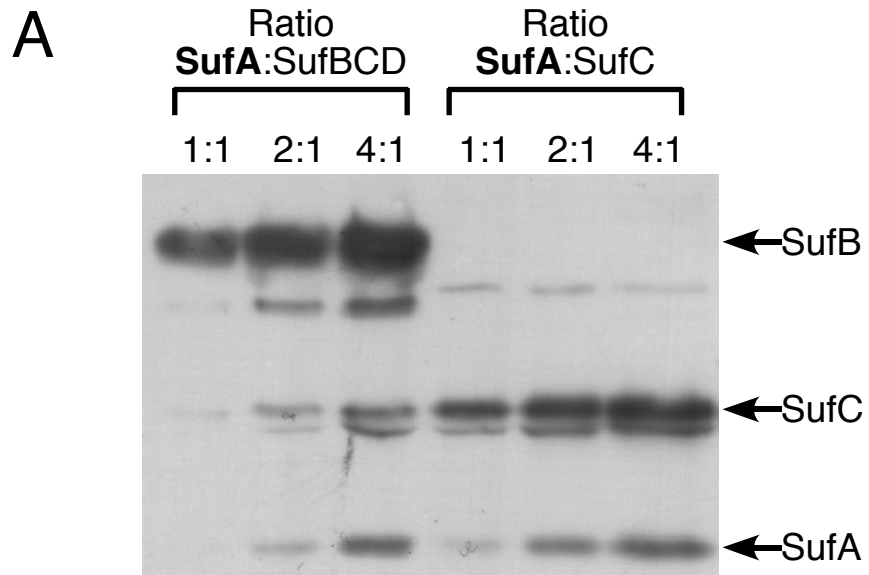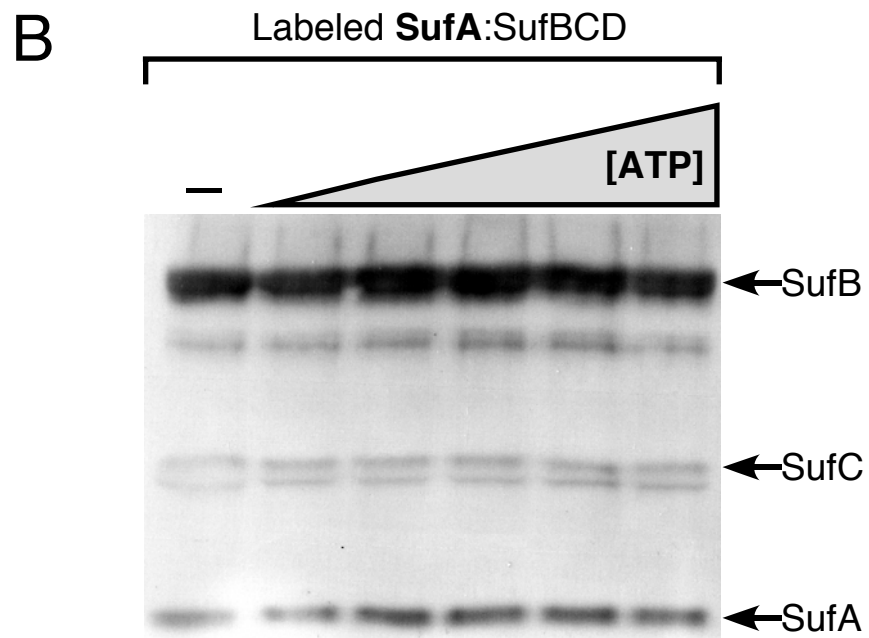

Figure S2

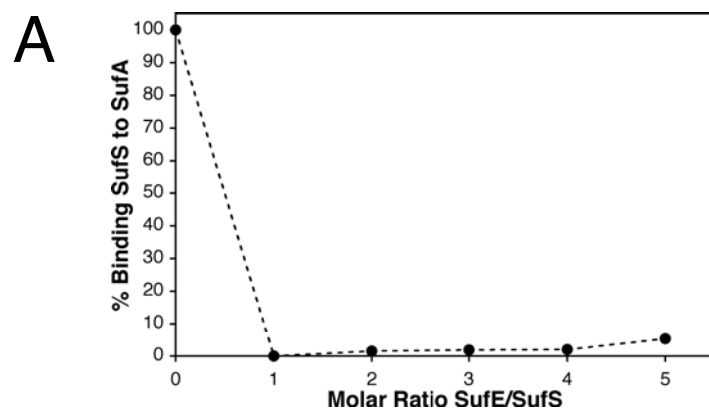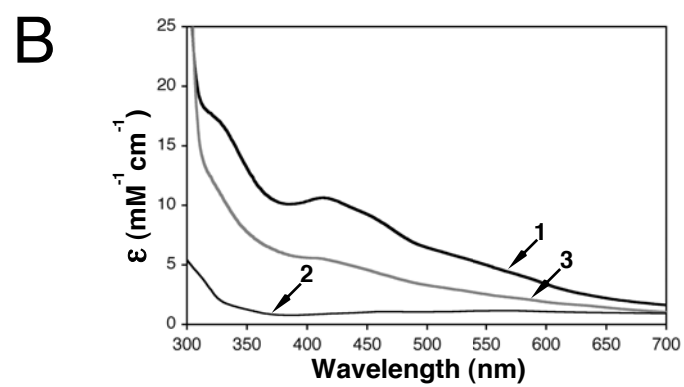

Figure S3

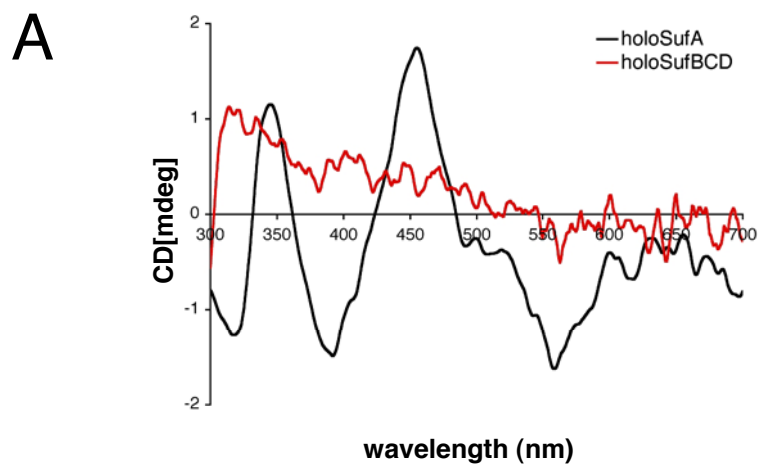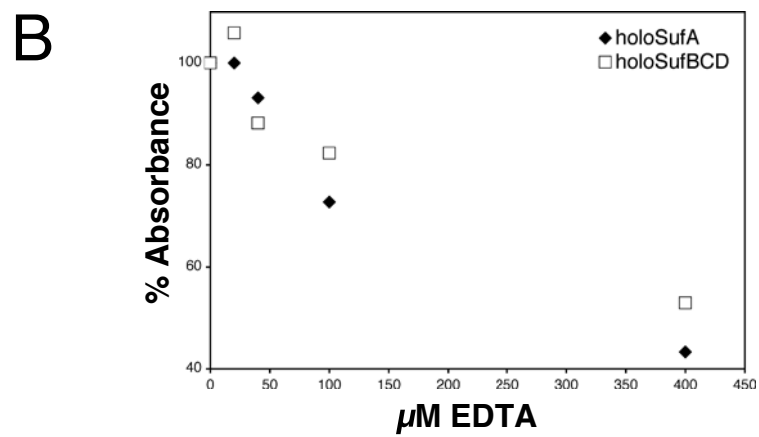

Supplement: NIHMS153675-supplement-1_si_001.pdf [file NIHMS153675-supplement-1_si_001.pdf]
